# Supplementary material for: The VVBlue assay: a plate-readable, dye exclusion-based cell viability assay for the toxicological testing of chemicals
Source: Royal Society of Chemistry journal article supplement (doi:10.1039/d4ra08606f), 2025-01-01
Supplement: d4ra08606f2.xlsx [file d4ra08606f2.xlsx]

## Sheet: Feuil1
1) Plate preparation
Centrifuge cell culture plate for 2 min at 1200 rpm	Centrifugation prevents any loss of cells
Remove the medium form well containing 100% dead cells add 300µL of Ethanol (EtOH) 50% for 3-5 min at RT	The addition of ethanol induces cell death and makes their membranes permeable
Rinse with DMEM live cell wells	The medium may have been affected by the 48h culture period or the presence of particles, prompting its replacement with a fresh one
Remove EtOH 50%	The exposure to ethanol dehydrates the cells, necessitating hydration before dyeing them
Rinse wells once with clean medium
Add a volume of clean DMEM
2) Alphazurine dye
Add AlphazurineA at a final concentration of 0,2 mg/mL in all wells	Alphazurine is added to fresh medium to maintain cells in a favourable environment while staining, ensuring that viability remains uncompromised
Incubate 40 min at 37°C	Incubating cells under cultured conditions ensures that viability remains uncompromised
Centrifuge 3 min at 1200 rpm	Centrifugation prevents any loss of cells
Rinse 3x with 1X Phosphate-buffered saline (PBS)	Rinsing cells with PBS facilitates the removal of dye that have not entered the cells
Centrifuge for 3 min at 1200 rpm after each rinse	Centrifugation prevents any loss of cells
Remove the supernatant	The last rinse with PBS has to be remove before adding the elution solution
Elute by adding a volume of 50% ethanol 1% acetic acid solution	Adding acetic acid to ethanol enhances the dye solubility
Incubate 30 min at RT on a shaker	Centrifugation prevents any loss of cells
Centrifuge for 2 min at 1200 rpm
Transfer 200µL into a 96-well plate	To eliminate the potential interference from cell absorbance on the original plate, it is advisable to transfer a portion on supernatant into a new plate
Read absorbance at 637 nm
3)Crystal violet dye
Remove the remaining alphazurine eluate	The elution solution dehydrates the cells, necessitating hydration before dyeing them with another dye
Rinse once with PBS
Add a volume of CV solution at 4 μg/ml	As the cells are dead, exposure to water poses no risk to them, so this solution can be prepared using either water or PBS
Incubate 30 min at RT	It is not necessary for cells to be under culture conditions for this staining, as all cells are dead
Centrifuge 3 min at 1200 rpm	Centrifugation prevents any loss of cells
Rinse 3x with PBS	Rinsing cells with PBS facilitates the removal of dye that have not stained the cells
Centrifuge for 3 min at 1200 rpm after each rinse	Centrifugation prevents any loss of cells
Remove the supernatant	The last rinse with PBS has to be remove before adding the elution solution
Elute by adding a volume of 50% EtOH 1% acetic acid solution	Adding acetic acid to ethanol enhances the dye solubility
Incubate 45 min at RT on a shaker	Centrifugation prevents any loss of cells
Centrifuge for 2 min at 1200 rpm
Transfer 200µL into a 96-well plate	To eliminate the potential interference from cell absorbance on the original plate, it is advisable to transfer a portion on supernatant into a new plate
Read absorbance at 590 nm
